# Supplementary material
Source: Elsevier journal article supplement (https://discovery-pp.ucl.ac.uk/id/eprint/1465453/3/mmc2.docx)
Supplement: mmc2 [file mmc2.docx]

A

Supplementary Figure 1

B

C
